# Supplementary material for: What Does Neuroscience Tell Us About the Conversion Model of Functional Neurological Disorders?
Source: Atypon-hosted journal article supplement (doi:10.1176/appi.neuropsych.19040089), 2019-10-17
Supplement: appi.neuropsych.19040089.ds001.pdf [file appi.neuropsych.19040089.ds001.pdf]

**Supplementary Figure S1: Suppression/repression of unwanted memories in functional neurological disorder**

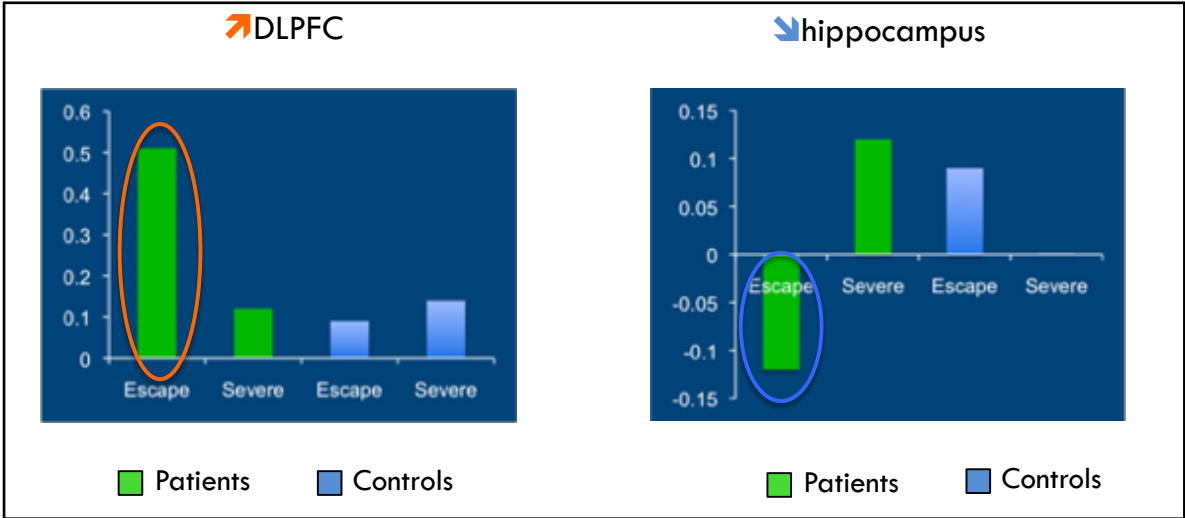

Brain activity (BOLD signal) during an fMRI task where subjects had to remember two kinds of traumatic autobiographical memories. **Escape** events had a potential secondary gain, **Severe** events did not. During the recall of Escape events patients had a higher activity in the dorsolateral prefrontal cortex (DLPFC) (left panel) and decreased activity in the hippocampus (right panel); a pattern typical for the suppression of unwanted memories
